# Supplementary material for: Primary cilia control endothelial permeability by regulating expression and location of junction proteins
Source: PubMed Central journal article supplement — Cardiovasc Res. 2021 May 11;118(6):1583–96. doi: 10.1093/cvr/cvab165 (PMC9074981; doi:10.1093/cvr/cvab165), 2021-05-11
Supplement: cvab165_supplementary_data.pdf [file cvab165_supplementary_data.pdf]

## **Supplementary material:**

### **Primary cilia control endothelial permeability by regulating expression and location of junction proteins**

Mannekomba R. Diagbouga<sup>1</sup>, Sandrine Morel<sup>1,2</sup>, Anne F. Cayron<sup>1,3,4</sup>, Julien Haemmerli<sup>2</sup>, Marc Georges<sup>2</sup>, Beerend P. Hierck<sup>5</sup>, E. Allémann<sup>3,4</sup>, Sylvain Lemeille<sup>1</sup>, Philippe Bijlenga<sup>2</sup>, Brenda R. Kwak<sup>1</sup>

<sup>1</sup>Department of Pathology and Immunology, <sup>2</sup>Department of Clinical Neurosciences - Neurosurgery Division, Faculty of Medicine, University of Geneva, Switzerland

<sup>3</sup>School of Pharmaceutical Sciences, University of Geneva, Switzerland

<sup>4</sup>Institute of Pharmaceutical Sciences of Western Switzerland, University of Geneva, Switzerland

<sup>5</sup>Department of Anatomy and Embryology, Leiden University Medical Center, the Netherlands

Correspondence:

Brenda R Kwak, PhD

Dept. of Pathology and Immunology

University of Geneva

Rue Michel-Servet 1

1211 Geneva

Switzerland

Phone: +41 22 379 56 66

E-mail: [Brenda.KwakChanson@unige.ch](mailto:Brenda.KwakChanson@unige.ch)

## Supplemental figure 1

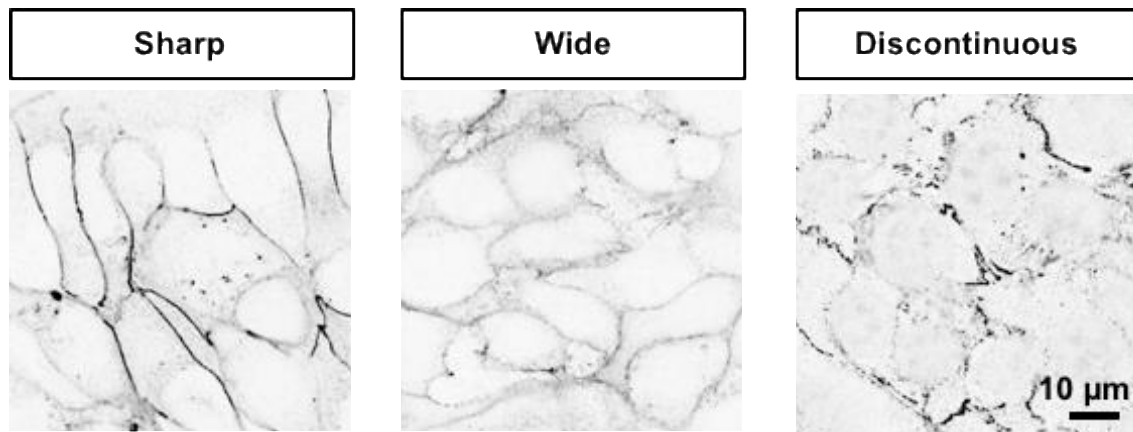

**Figure S1:** Representative images illustrating junctional organization categories.

## Supplemental figure 2

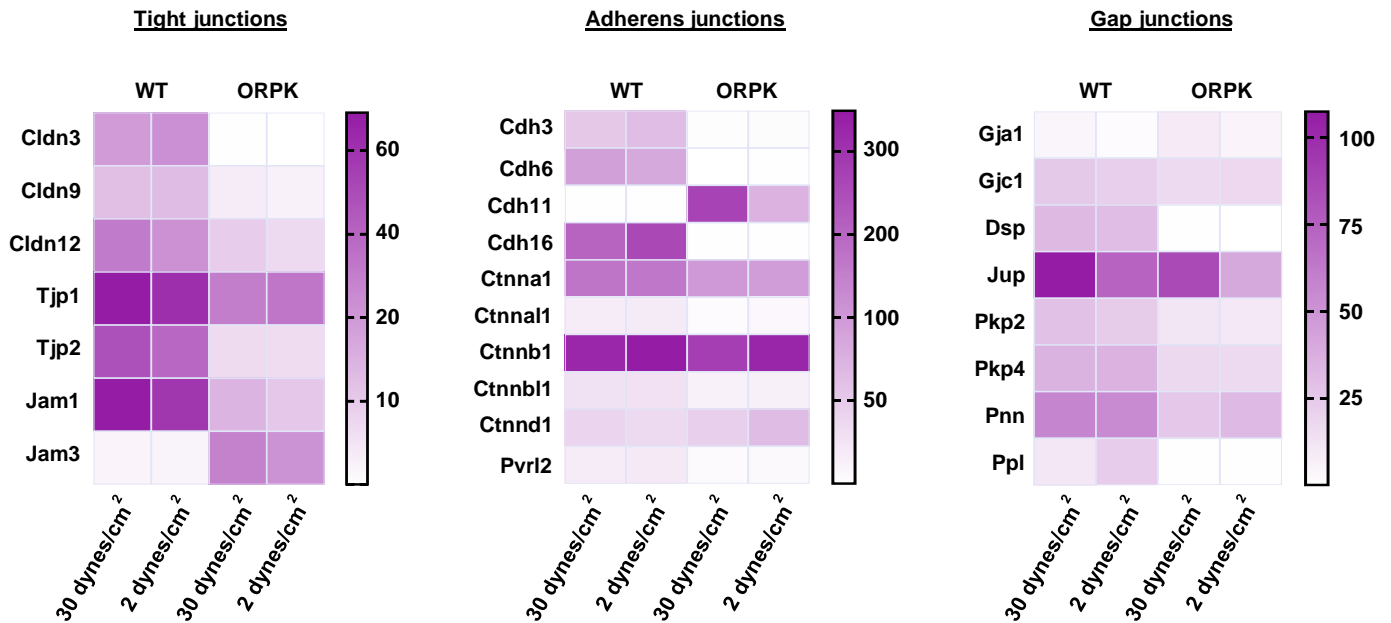

**Figure S2:** Heatmaps comparing expression levels of tight junctions, adherens junctions, gap junctions and associated desmosomal-family genes in wild-type (WT) and *Tg737<sup>orpk/orpk</sup>* (ORPK) ECs. Gene expression levels are represented in RPKM.

### Supplemental figure 3

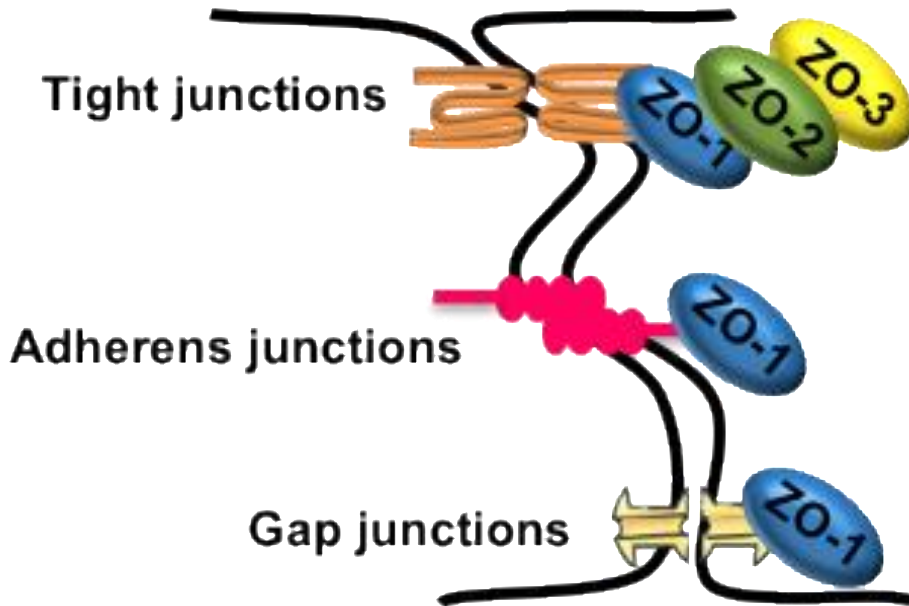

**Figure S3:** Schematic representation of ZO-1 linking to tight junction, adherens junction and gap junction proteins.

## Supplemental figure 4

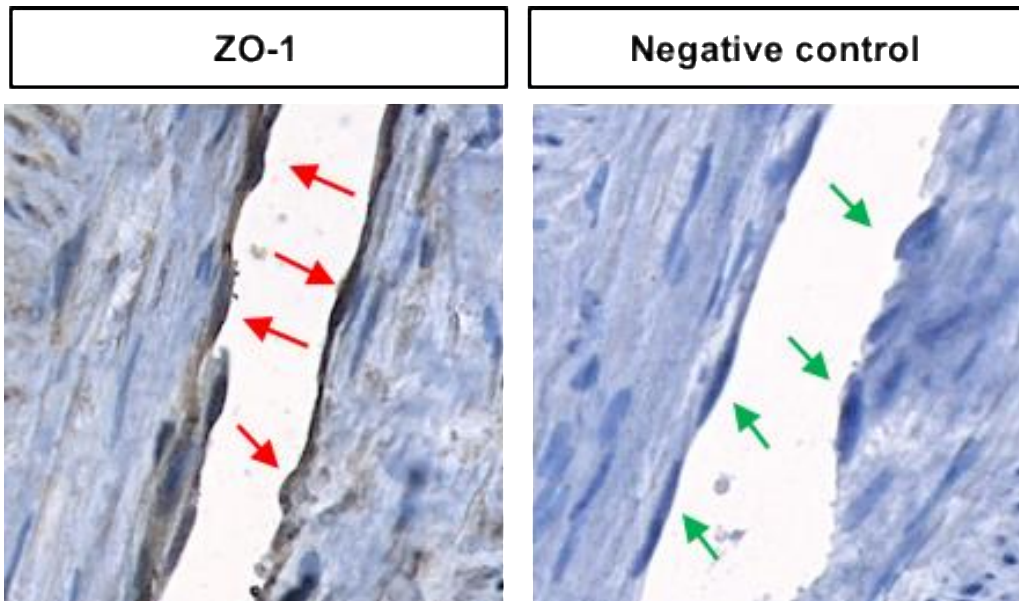

**Figure S4:** Representative examples of ZO-1 immunostaining (in brown; some positive ECs are indicated with red arrows) and its negative control (omission of first antibody; some not stained ECs are indicated with green arrows) performed on a human superficial temporal artery.

**Table S1: Differentially expressed genes in wild-type ECs: 2 vs. 30dynes/cm<sup>2</sup>**Genes in **bold** are cilia-independent regulated genes, also changed in Tg737<sup>orpk/orpk</sup> ECs

| Gene_id                   | Gene_name            | Log <sub>2</sub> fold change | P-value           |
|---------------------------|----------------------|------------------------------|-------------------|
| <b>ENSMUSG00000074896</b> | <b><i>Ifit3</i></b>  | <b>3.64</b>                  | <b>9.437E-91</b>  |
| ENSMUSG00000062488        | <i>I830012O16Rik</i> | 2.95                         | 2.296E-27         |
| ENSMUSG00000023122        | <i>Sult1c2</i>       | 2.49                         | 6.648E-68         |
| ENSMUSG00000024621        | <i>Csflr</i>         | 2.20                         | 3.114E-155        |
| ENSMUSG00000016942        | <i>Tmprss6</i>       | 2.18                         | 1.207E-47         |
| <b>ENSMUSG00000022206</b> | <b><i>Npr3</i></b>   | <b>2.03</b>                  | <b>1.268E-263</b> |
| ENSMUSG00000027831        | <i>Veph1</i>         | 2.00                         | 1.683E-35         |
| ENSMUSG00000029372        | <i>Ppbp</i>          | 1.99                         | 1.066E-13         |
| ENSMUSG00000047230        | <i>Cldn2</i>         | 1.94                         | 1.727E-101        |
| ENSMUSG00000023914        | <i>Mep1a</i>         | 1.91                         | 2.243E-22         |
| ENSMUSG00000035451        | <i>Foxa1</i>         | 1.86                         | 5.023E-45         |
| ENSMUSG00000057265        | <i>Ccdc176</i>       | 1.85                         | 4.890E-29         |
| ENSMUSG00000017002        | <i>Slpi</i>          | 1.84                         | 1.197E-18         |
| ENSMUSG00000020990        | <i>Cdkl1</i>         | 1.82                         | 1.752E-39         |
| ENSMUSG00000018126        | <i>Baiap2l2</i>      | 1.81                         | 7.513E-12         |
| ENSMUSG00000023959        | <i>Clic5</i>         | 1.77                         | 1.385E-88         |
| ENSMUSG00000017868        | <i>Sgk2</i>          | 1.76                         | 6.567E-25         |
| <b>ENSMUSG00000031980</b> | <b><i>Agt</i></b>    | <b>1.74</b>                  | <b>2.851E-40</b>  |
| ENSMUSG00000079017        | <i>Ifi27l2a</i>      | 1.72                         | 1.955E-04         |
| ENSMUSG00000049907        | <i>Rasl11b</i>       | 1.70                         | 8.453E-156        |
| <b>ENSMUSG00000034459</b> | <b><i>Ifit1</i></b>  | <b>1.70</b>                  | <b>5.828E-57</b>  |
| <b>ENSMUSG00000037010</b> | <b><i>Apln</i></b>   | <b>1.69</b>                  | <b>4.517E-156</b> |
| ENSMUSG00000020486        | <i>Sept4</i>         | 1.68                         | 4.606E-74         |
| ENSMUSG00000021223        | <i>Papln</i>         | 1.68                         | 1.747E-66         |
| ENSMUSG00000005232        | <i>G6pc2</i>         | 1.67                         | 1.532E-73         |
| ENSMUSG00000071551        | <i>Akr1c19</i>       | 1.64                         | 2.008E-25         |
| ENSMUSG00000028357        | <i>Kif12</i>         | 1.61                         | 1.148E-27         |
| ENSMUSG00000074183        | <i>Gsta1</i>         | 1.59                         | 4.871E-04         |
| <b>ENSMUSG00000024910</b> | <b><i>Ctsw</i></b>   | <b>-4.34</b>                 | <b>1.499E-119</b> |
| ENSMUSG00000036381        | <i>P2ry14</i>        | -4.07                        | 1.134E-74         |
| <b>ENSMUSG00000046318</b> | <b><i>Ccbe1</i></b>  | <b>-4.07</b>                 | <b>5.731E-25</b>  |
| <b>ENSMUSG00000026414</b> | <b><i>Tnnt2</i></b>  | <b>-3.07</b>                 | <b>1.175E-177</b> |
| ENSMUSG00000007888        | <i>Crlfl</i>         | -2.50                        | 1.250E-249        |
| <b>ENSMUSG00000031075</b> | <b><i>Ano1</i></b>   | <b>-2.45</b>                 | <b>2.651E-177</b> |
| <b>ENSMUSG00000079465</b> | <b><i>Col4a3</i></b> | <b>-2.23</b>                 | <b>6.600E-52</b>  |
| <b>ENSMUSG00000038400</b> | <b><i>Pmepa1</i></b> | <b>-2.23</b>                 | <b>0.000E+00</b>  |
| <b>ENSMUSG00000027750</b> | <b><i>Postn</i></b>  | <b>-2.21</b>                 | <b>2.023E-28</b>  |

| Gene_id            | Gene_name       | Log <sub>2</sub> fold change | P-value    |
|--------------------|-----------------|------------------------------|------------|
| ENSMUSG00000019564 | <i>Arid3a</i>   | -2.19                        | 7.423E-91  |
| ENSMUSG00000037411 | <i>Serpine1</i> | -2.18                        | 1.451E-255 |
| ENSMUSG00000026069 | <i>Il1rl1</i>   | -2.18                        | 2.381E-39  |
| ENSMUSG00000047501 | <i>Cldn4</i>    | -2.17                        | 1.604E-32  |
| ENSMUSG00000042436 | <i>Mfap4</i>    | -2.03                        | 1.369E-37  |
| ENSMUSG00000020325 | <i>Fstl3</i>    | -2.02                        | 4.927E-42  |
| ENSMUSG00000067158 | <i>Col4a4</i>   | -2.00                        | 1.089E-74  |
| ENSMUSG00000049699 | <i>Ucn2</i>     | -1.92                        | 1.798E-21  |
| ENSMUSG00000003283 | <i>Hck</i>      | -1.89                        | 5.014E-12  |
| ENSMUSG00000033722 | <i>BC034090</i> | -1.80                        | 2.775E-79  |
| ENSMUSG00000019997 | <i>Ctgf</i>     | -1.71                        | 3.342E-199 |
| ENSMUSG00000025650 | <i>Col7a1</i>   | -1.70                        | 5.813E-235 |
| ENSMUSG00000030827 | <i>Fgf21</i>    | -1.69                        | 3.520E-73  |
| ENSMUSG00000032332 | <i>Col12a1</i>  | -1.67                        | 7.540E-112 |
| ENSMUSG00000009687 | <i>Fxyd5</i>    | -1.59                        | 2.288E-20  |

**Table S2: Differentially expressed genes in Tg737<sup>orpk/orpk</sup> ECs: 2 vs. 30dynes/cm<sup>2</sup>**Genes in **bold** are cilia-independent regulated genes, also changed in wild-type ECs

| Gene_id                   | Gene_name            | Log <sub>2</sub> fold change | P-value          |
|---------------------------|----------------------|------------------------------|------------------|
| ENSMUSG00000052143        | <i>Gm9869</i>        | 6.94                         | 9.107E-07        |
| ENSMUSG00000096001        | <i>2610528A11Rik</i> | 6.66                         | 0.000E+00        |
| ENSMUSG00000068122        | <i>Agtr2</i>         | 6.20                         | 1.627E-39        |
| ENSMUSG00000020297        | <i>Nsg2</i>          | 5.25                         | 7.285E-30        |
| ENSMUSG00000025488        | <i>Cox8b</i>         | 4.67                         | 7.148E-08        |
| ENSMUSG00000027875        | <i>Hmgcs2</i>        | 4.40                         | 4.338E-94        |
| ENSMUSG00000103344        | <i>Gbp11</i>         | 4.30                         | 2.596E-19        |
| ENSMUSG00000038393        | <i>Txnip</i>         | 4.22                         | 0.000E+00        |
| ENSMUSG00000026023        | <i>Cdk15</i>         | 4.22                         | 1.453E-14        |
| <b>ENSMUSG00000037010</b> | <b><i>Apln</i></b>   | <b>3.90</b>                  | <b>0.000E+00</b> |
| ENSMUSG00000105096        | <i>Gbp10</i>         | 3.85                         | 1.827E-39        |
| ENSMUSG00000036295        | <i>Lrrn3</i>         | 3.77                         | 1.474E-190       |
| ENSMUSG00000068874        | <i>Selenbp1</i>      | 3.70                         | 1.780E-17        |
| ENSMUSG00000026894        | <i>Morn5</i>         | 3.58                         | 7.221E-09        |
| ENSMUSG00000035258        | <i>Abi3bp</i>        | 3.56                         | 1.295E-70        |
| ENSMUSG00000024810        | <i>Il33</i>          | 3.51                         | 2.514E-36        |
| ENSMUSG00000019359        | <i>Gdpd2</i>         | 3.49                         | 3.574E-27        |
| ENSMUSG00000079363        | <i>Gbp4</i>          | 3.47                         | 1.163E-112       |
| ENSMUSG00000027996        | <i>Sfrp2</i>         | 3.41                         | 6.732E-34        |
| ENSMUSG00000029298        | <i>Gbp9</i>          | 3.39                         | 0.000E+00        |
| ENSMUSG00000060224        | <i>Pyroxd2</i>       | 3.34                         | 1.653E-47        |
| ENSMUSG00000053199        | <i>Arhgap20</i>      | 3.33                         | 3.854E-289       |
| ENSMUSG00000025784        | <i>Clec3b</i>        | 3.30                         | 9.026E-95        |
| ENSMUSG00000074207        | <i>Adh1</i>          | 3.29                         | 2.488E-86        |
| ENSMUSG00000004035        | <i>Gstm7</i>         | 3.27                         | 9.476E-19        |
| ENSMUSG00000104713        | <i>Gbp6</i>          | 3.25                         | 6.290E-26        |
| ENSMUSG00000039155        | <i>Cdh26</i>         | 3.15                         | 6.864E-104       |
| ENSMUSG00000043073        | <i>Usp17le</i>       | 3.11                         | 1.305E-25        |
| ENSMUSG00000052957        | <i>Gas1</i>          | 3.09                         | 0.000E+00        |
| ENSMUSG00000041797        | <i>Abca9</i>         | 3.07                         | 3.773E-65        |
| ENSMUSG00000039518        | <i>Cdsn</i>          | 3.07                         | 1.184E-249       |
| ENSMUSG00000067780        | <i>Pi15</i>          | 3.01                         | 5.218E-103       |
| ENSMUSG00000030406        | <i>Gipr</i>          | 2.97                         | 1.951E-13        |
| ENSMUSG00000028713        | <i>Cyp4b1</i>        | 2.97                         | 3.667E-20        |
| ENSMUSG00000034438        | <i>Gbp8</i>          | 2.93                         | 3.238E-193       |
| ENSMUSG00000078566        | <i>Bnip3</i>         | 2.92                         | 0.000E+00        |
| ENSMUSG00000019880        | <i>Rspo3</i>         | 2.85                         | 1.047E-301       |



| Gene_id                   | Gene_name           | Log <sub>2</sub> fold change | P-value          |
|---------------------------|---------------------|------------------------------|------------------|
| ENSMUSG00000035042        | <i>Ccl5</i>         | 2.80                         | 2.275E-40        |
| ENSMUSG00000022512        | <i>Cldn1</i>        | 2.80                         | 2.223E-73        |
| ENSMUSG00000040253        | <i>Gbp7</i>         | 2.80                         | 3.810E-46        |
| <b>ENSMUSG00000034459</b> | <b><i>Ifit1</i></b> | <b>2.78</b>                  | <b>3.792E-94</b> |
| ENSMUSG00000021872        | <i>Rnase10</i>      | 2.73                         | 4.961E-24        |
| ENSMUSG00000038233        | <i>Fam198a</i>      | 2.72                         | 2.639E-27        |
| ENSMUSG00000061082        | <i>Plac1</i>        | 2.71                         | 9.470E-11        |
| ENSMUSG00000037206        | <i>Islr</i>         | 2.68                         | 2.705E-277       |
| ENSMUSG00000041112        | <i>Elmo1</i>        | 2.68                         | 0.000E+00        |
| ENSMUSG00000028270        | <i>Gbp2</i>         | 2.67                         | 6.640E-208       |
| ENSMUSG00000037161        | <i>Mgarp</i>        | 2.65                         | 6.541E-18        |
| ENSMUSG00000034810        | <i>Scn7a</i>        | 2.65                         | 2.158E-84        |
| ENSMUSG00000059921        | <i>Unc5c</i>        | 2.64                         | 9.397E-311       |
| ENSMUSG00000029167        | <i>Ppargc1a</i>     | 2.61                         | 1.413E-134       |
| ENSMUSG00000036446        | <i>Lum</i>          | 2.59                         | 4.639E-138       |
| ENSMUSG00000017446        | <i>C1qtnf1</i>      | 2.58                         | 9.769E-102       |
| ENSMUSG00000029838        | <i>Ptn</i>          | 2.58                         | 0.000E+00        |
| ENSMUSG00000073530        | <i>Pappa2</i>       | 2.58                         | 5.852E-82        |
| ENSMUSG00000009246        | <i>Trpm5</i>        | 2.56                         | 5.212E-38        |
| ENSMUSG00000037379        | <i>Spon2</i>        | 2.52                         | 5.362E-78        |
| ENSMUSG00000037621        | <i>Atoh8</i>        | 2.51                         | 4.116E-27        |
| ENSMUSG00000020644        | <i>Id2</i>          | 2.42                         | 1.534E-74        |
| ENSMUSG00000049409        | <i>Prokr1</i>       | 2.41                         | 5.751E-61        |
| ENSMUSG00000074794        | <i>Arrdc3</i>       | 2.41                         | 1.298E-124       |
| ENSMUSG00000079580        | <i>Tmem217</i>      | 2.39                         | 3.164E-07        |
| ENSMUSG00000028289        | <i>Epha7</i>        | 2.37                         | 9.740E-180       |
| ENSMUSG00000030222        | <i>Rerg</i>         | 2.37                         | 9.340E-42        |
| ENSMUSG00000024084        | <i>Qpct</i>         | 2.36                         | 2.581E-14        |
| ENSMUSG00000046546        | <i>Fam43a</i>       | 2.35                         | 3.974E-121       |
| ENSMUSG00000071047        | <i>Ces1a</i>        | 2.31                         | 5.534E-81        |
| ENSMUSG00000006494        | <i>Pdk1</i>         | 2.30                         | 2.870E-257       |
| ENSMUSG00000027408        | <i>Cpxm1</i>        | 2.29                         | 2.756E-81        |
| ENSMUSG00000067276        | <i>Capn6</i>        | 2.28                         | 0.000E+00        |
| ENSMUSG00000022883        | <i>Robo1</i>        | 2.27                         | 1.022E-47        |
| ENSMUSG00000021806        | <i>Nid2</i>         | 2.26                         | 0.000E+00        |
| ENSMUSG00000074604        | <i>Mgst2</i>        | 2.24                         | 6.825E-12        |
| ENSMUSG00000037362        | <i>Nov</i>          | 2.22                         | 1.709E-245       |
| ENSMUSG00000096727        | <i>Psmb9</i>        | 2.21                         | 1.153E-41        |
| ENSMUSG00000001663        | <i>Gstt1</i>        | 2.20                         | 1.895E-27        |
| ENSMUSG00000057346        | <i>Apol9a</i>       | 2.20                         | 1.005E-18        |

| Gene_id                   | Gene_name           | Log <sub>2</sub> fold change | P-value          |
|---------------------------|---------------------|------------------------------|------------------|
| ENSMUSG00000029371        | <i>Cxcl5</i>        | 2.20                         | 1.458E-27        |
| ENSMUSG00000039031        | <i>Arhgap18</i>     | 2.13                         | 3.245E-117       |
| ENSMUSG00000022758        | <i>P2rx6</i>        | 2.13                         | 4.055E-27        |
| ENSMUSG00000015090        | <i>Ptgds</i>        | 2.12                         | 1.017E-36        |
| ENSMUSG00000050359        | <i>Sprrla</i>       | 2.06                         | 1.962E-10        |
| ENSMUSG00000022148        | <i>Fyb</i>          | 2.06                         | 4.640E-24        |
| ENSMUSG00000005950        | <i>P2rx5</i>        | 2.05                         | 1.600E-28        |
| ENSMUSG00000019768        | <i>Esr1</i>         | 2.05                         | 8.149E-62        |
| ENSMUSG00000024066        | <i>Xdh</i>          | 2.03                         | 0.000E+00        |
| ENSMUSG00000014782        | <i>Plekhg4</i>      | 2.02                         | 1.198E-273       |
| ENSMUSG00000064373        | <i>Sepp1</i>        | 2.00                         | 4.159E-213       |
| ENSMUSG00000025911        | <i>Adhfe1</i>       | 2.00                         | 7.057E-33        |
| ENSMUSG00000032246        | <i>Calml4</i>       | 1.99                         | 2.684E-83        |
| ENSMUSG00000039217        | <i>Il18</i>         | 1.99                         | 2.003E-15        |
| <b>ENSMUSG00000074896</b> | <b><i>Ifit3</i></b> | <b>1.96</b>                  | <b>2.422E-13</b> |
| ENSMUSG00000032625        | <i>Thsd7a</i>       | 1.93                         | 0.000E+00        |
| ENSMUSG00000033355        | <i>Rtp4</i>         | 1.93                         | 1.192E-13        |
| ENSMUSG00000005360        | <i>Slc1a3</i>       | 1.92                         | 3.957E-135       |
| ENSMUSG00000052160        | <i>Pld4</i>         | 1.91                         | 3.101E-09        |
| ENSMUSG00000038527        | <i>Clrl</i>         | 1.91                         | 5.506E-121       |
| ENSMUSG00000029380        | <i>Cxcl1</i>        | 1.90                         | 1.213E-28        |
| ENSMUSG00000057596        | <i>Trim30d</i>      | 1.90                         | 3.625E-61        |
| ENSMUSG00000057897        | <i>Camk2b</i>       | 1.89                         | 2.424E-23        |
| ENSMUSG00000015243        | <i>Abca1</i>        | 1.89                         | 0.000E+00        |
| ENSMUSG00000029563        | <i>Foxp2</i>        | 1.89                         | 1.720E-62        |
| ENSMUSG00000037005        | <i>Xpnp2</i>        | 1.89                         | 3.230E-103       |
| ENSMUSG00000029231        | <i>Pdgfra</i>       | 1.88                         | 7.336E-273       |
| ENSMUSG00000003949        | <i>Hlf</i>          | 1.88                         | 6.467E-29        |
| ENSMUSG00000022836        | <i>Mylk</i>         | 1.88                         | 7.587E-104       |
| ENSMUSG00000045031        | <i>Cetn4</i>        | 1.87                         | 8.703E-06        |
| ENSMUSG00000052921        | <i>Arhgef15</i>     | 1.86                         | 1.769E-20        |
| ENSMUSG00000004558        | <i>Ndr2</i>         | 1.85                         | 9.398E-137       |
| ENSMUSG00000028565        | <i>Nfia</i>         | 1.85                         | 4.073E-51        |
| ENSMUSG00000029561        | <i>Oasl2</i>        | 1.84                         | 7.685E-21        |
| ENSMUSG00000022707        | <i>Gbe1</i>         | 1.84                         | 1.378E-300       |
| ENSMUSG00000028268        | <i>Gbp3</i>         | 1.83                         | 6.178E-14        |
| ENSMUSG00000022537        | <i>Tmem44</i>       | 1.82                         | 2.679E-31        |
| ENSMUSG00000030257        | <i>Srgap3</i>       | 1.81                         | 5.628E-159       |
| ENSMUSG00000025931        | <i>Paqr8</i>        | 1.80                         | 5.568E-113       |
| ENSMUSG00000025321        | <i>Itgb8</i>        | 1.80                         | 2.220E-140       |

| Gene_id                   | Gene_name          | Log <sub>2</sub> fold change | P-value          |
|---------------------------|--------------------|------------------------------|------------------|
| ENSMUSG00000022419        | <i>Deptor</i>      | 1.80                         | 5.475E-125       |
| ENSMUSG00000054640        | <i>Slc8a1</i>      | 1.78                         | 8.617E-53        |
| ENSMUSG00000020623        | <i>Map2k6</i>      | 1.78                         | 8.107E-28        |
| ENSMUSG00000023064        | <i>Sncg</i>        | 1.77                         | 7.504E-05        |
| ENSMUSG00000028359        | <i>Orm3</i>        | 1.77                         | 2.418E-08        |
| ENSMUSG00000027832        | <i>Ptx3</i>        | 1.77                         | 2.854E-166       |
| ENSMUSG00000049985        | <i>Ankrd55</i>     | 1.77                         | 2.822E-22        |
| ENSMUSG00000026896        | <i>Ifih1</i>       | 1.76                         | 2.240E-38        |
| ENSMUSG00000017417        | <i>Plxdc1</i>      | 1.76                         | 1.973E-170       |
| ENSMUSG00000041688        | <i>Amot</i>        | 1.75                         | 0.000E+00        |
| ENSMUSG00000024610        | <i>Cd74</i>        | 1.75                         | 4.024E-25        |
| ENSMUSG00000024109        | <i>Nrxn1</i>       | 1.74                         | 2.547E-16        |
| ENSMUSG00000053475        | <i>Tnfrsf6</i>     | 1.74                         | 4.753E-22        |
| ENSMUSG00000040254        | <i>Sema3d</i>      | 1.74                         | 1.593E-78        |
| <b>ENSMUSG00000022206</b> | <b><i>Npr3</i></b> | <b>1.73</b>                  | <b>1.327E-61</b> |
| ENSMUSG00000029096        | <i>Htra3</i>       | 1.72                         | 4.157E-28        |
| ENSMUSG00000038146        | <i>Notch3</i>      | 1.72                         | 4.020E-219       |
| ENSMUSG00000034855        | <i>Cxcl10</i>      | 1.71                         | 1.427E-12        |
| ENSMUSG00000022032        | <i>Scara5</i>      | 1.71                         | 1.809E-75        |
| ENSMUSG00000019899        | <i>Lama2</i>       | 1.71                         | 6.069E-43        |
| ENSMUSG00000040428        | <i>Plekha4</i>     | 1.71                         | 3.420E-33        |
| ENSMUSG00000041272        | <i>Tox</i>         | 1.70                         | 1.550E-60        |
| ENSMUSG00000039814        | <i>Xkr5</i>        | 1.70                         | 6.364E-23        |
| ENSMUSG00000022330        | <i>Osr2</i>        | 1.69                         | 1.658E-06        |
| ENSMUSG00000035493        | <i>Tgfb1</i>       | 1.69                         | 1.044E-182       |
| ENSMUSG00000003955        | <i>Fam162a</i>     | 1.68                         | 3.095E-293       |
| ENSMUSG00000055782        | <i>Abcd2</i>       | 1.68                         | 2.387E-36        |
| ENSMUSG00000021123        | <i>Rdh12</i>       | 1.68                         | 6.463E-18        |
| ENSMUSG00000020911        | <i>Krt19</i>       | 1.65                         | 1.145E-105       |
| ENSMUSG00000060063        | <i>Alox5ap</i>     | 1.65                         | 1.477E-06        |
| ENSMUSG00000056870        | <i>Gulp1</i>       | 1.65                         | 1.933E-139       |
| ENSMUSG00000052581        | <i>Lrrtm4</i>      | 1.65                         | 5.187E-90        |
| ENSMUSG00000031380        | <i>Figf</i>        | 1.64                         | 2.599E-251       |
| ENSMUSG00000036334        | <i>Igsf10</i>      | 1.64                         | 2.990E-153       |
| ENSMUSG00000021591        | <i>Glrx</i>        | 1.64                         | 2.458E-56        |
| ENSMUSG00000036109        | <i>Mbnl3</i>       | 1.64                         | 1.918E-16        |
| ENSMUSG00000059013        | <i>Sh2d3c</i>      | 1.64                         | 1.714E-30        |
| ENSMUSG00000039883        | <i>Lrrc17</i>      | 1.63                         | 2.480E-223       |
| ENSMUSG00000006586        | <i>Runx1t1</i>     | 1.63                         | 1.364E-100       |
| ENSMUSG00000025422        | <i>Agap2</i>       | 1.63                         | 3.098E-71        |

| Gene_id                   | Gene_name              | Log <sub>2</sub> fold change | P-value           |
|---------------------------|------------------------|------------------------------|-------------------|
| ENSMUSG00000035692        | <i>Isg15</i>           | 1.62                         | 2.185E-38         |
| ENSMUSG00000068762        | <i>Gstm6</i>           | 1.62                         | 1.843E-07         |
| <b>ENSMUSG00000031980</b> | <b><i>Agt</i></b>      | <b>1.62</b>                  | <b>2.535E-13</b>  |
| ENSMUSG00000027217        | <i>Tspan18</i>         | 1.61                         | 2.463E-14         |
| ENSMUSG00000019817        | <i>Plagl1</i>          | 1.61                         | 4.611E-71         |
| ENSMUSG00000038319        | <i>Kcnh2</i>           | 1.61                         | 2.711E-84         |
| ENSMUSG00000024338        | <i>Psmb8</i>           | 1.61                         | 2.971E-68         |
| ENSMUSG00000031099        | <i>Smarca1</i>         | 1.61                         | 8.532E-67         |
| ENSMUSG00000028555        | <i>Ttc39a</i>          | 1.60                         | 2.476E-16         |
| ENSMUSG00000022548        | <i>Apod</i>            | 1.59                         | 1.623E-17         |
| ENSMUSG00000039063        | <i>Echdc3</i>          | 1.59                         | 3.778E-17         |
| ENSMUSG00000031618        | <i>Nr3c2</i>           | 1.59                         | 9.667E-81         |
| ENSMUSG00000039519        | <i>Cyp7b1</i>          | 1.59                         | 2.961E-17         |
| ENSMUSG00000022231        | <i>Sema5a</i>          | 1.59                         | 5.065E-136        |
| ENSMUSG00000046275        | <i>Tusc5</i>           | -6.38                        | 2.232E-62         |
| ENSMUSG00000083282        | <i>Ctsf</i>            | -6.19                        | 1.738E-34         |
| ENSMUSG00000045545        | <i>Krt14</i>           | -5.12                        | 5.084E-64         |
| <b>ENSMUSG00000024910</b> | <b><i>Ctsw</i></b>     | <b>-4.96</b>                 | <b>2.615E-282</b> |
| ENSMUSG00000031780        | <i>Ccl17</i>           | -4.61                        | 4.735E-71         |
| ENSMUSG00000021950        | <i>Anxa8</i>           | -4.22                        | 0.000E+00         |
| ENSMUSG00000024011        | <i>Pi16</i>            | -4.14                        | 1.553E-229        |
| ENSMUSG00000022596        | <i>Slurp1</i>          | -3.70                        | 6.207E-150        |
| <b>ENSMUSG00000037411</b> | <b><i>Serpine1</i></b> | <b>-3.45</b>                 | <b>0.000E+00</b>  |
| ENSMUSG00000056498        | <i>Tmem154</i>         | -3.26                        | 6.790E-49         |
| ENSMUSG00000000489        | <i>Pdgfb</i>           | -3.26                        | 1.045E-120        |
| ENSMUSG00000038840        | <i>Birc7</i>           | -3.15                        | 9.355E-37         |
| ENSMUSG00000022096        | <i>Hr</i>              | -3.10                        | 2.425E-59         |
| ENSMUSG00000006014        | <i>Prg4</i>            | -3.07                        | 1.700E-112        |
| ENSMUSG00000030109        | <i>Slc6a12</i>         | -3.07                        | 2.306E-45         |
| ENSMUSG00000058914        | <i>Clqtnf3</i>         | -3.04                        | 0.000E+00         |
| ENSMUSG00000002020        | <i>Ltbp2</i>           | -3.02                        | 0.000E+00         |
| <b>ENSMUSG00000019997</b> | <b><i>Ctgf</i></b>     | <b>-3.01</b>                 | <b>0.000E+00</b>  |
| ENSMUSG00000026639        | <i>Lamb3</i>           | -2.94                        | 5.987E-72         |
| ENSMUSG00000032172        | <i>Olfm2</i>           | -2.93                        | 8.143E-83         |
| ENSMUSG00000048521        | <i>Cxcr6</i>           | -2.90                        | 1.484E-17         |
| ENSMUSG00000032487        | <i>Ptgs2</i>           | -2.86                        | 0.000E+00         |
| ENSMUSG00000004371        | <i>Il11</i>            | -2.84                        | 1.997E-14         |
| ENSMUSG00000073433        | <i>Arhgdig</i>         | -2.84                        | 3.358E-14         |
| ENSMUSG00000022018        | <i>Rgcc</i>            | -2.82                        | 1.362E-15         |
| ENSMUSG00000045777        | <i>Ifitm10</i>         | -2.79                        | 9.615E-73         |

| Gene_id                   | Gene_name            | Log <sub>2</sub> fold change | P-value           |
|---------------------------|----------------------|------------------------------|-------------------|
| ENSMUSG00000052316        | <i>Lrrc15</i>        | -2.75                        | 2.225E-48         |
| <b>ENSMUSG00000026414</b> | <b><i>Tnnt2</i></b>  | <b>-2.69</b>                 | <b>1.071E-139</b> |
| <b>ENSMUSG00000079465</b> | <b><i>Col4a3</i></b> | <b>-2.69</b>                 | <b>4.576E-128</b> |
| <b>ENSMUSG00000038400</b> | <b><i>Pmepa1</i></b> | <b>-2.68</b>                 | <b>0.000E+00</b>  |
| ENSMUSG00000044006        | <i>Cilp2</i>         | -2.64                        | 1.437E-143        |
| ENSMUSG00000027470        | <i>Mylk2</i>         | -2.58                        | 3.450E-43         |
| ENSMUSG00000031530        | <i>Dusp4</i>         | -2.55                        | 0.000E+00         |
| ENSMUSG00000021208        | <i>Ifi2712b</i>      | -2.54                        | 1.551E-07         |
| ENSMUSG00000023915        | <i>Tnfrsf21</i>      | -2.50                        | 2.506E-102        |
| ENSMUSG00000037225        | <i>Fgf2</i>          | -2.50                        | 7.787E-191        |
| ENSMUSG00000036256        | <i>Igfbp7</i>        | -2.50                        | 0.000E+00         |
| ENSMUSG00000028179        | <i>Cth</i>           | -2.50                        | 1.129E-118        |
| ENSMUSG00000031972        | <i>Acta1</i>         | -2.49                        | 3.141E-101        |
| ENSMUSG00000027737        | <i>Slc7a11</i>       | -2.48                        | 0.000E+00         |
| ENSMUSG00000054555        | <i>Adam12</i>        | -2.42                        | 2.243E-259        |
| ENSMUSG00000029765        | <i>Plxna4</i>        | -2.39                        | 1.366E-245        |
| ENSMUSG00000042124        | <i>Lcelf</i>         | -2.36                        | 4.131E-05         |
| ENSMUSG00000029019        | <i>Nppb</i>          | -2.32                        | 4.195E-09         |
| ENSMUSG00000020099        | <i>Unc5b</i>         | -2.32                        | 0.000E+00         |
| <b>ENSMUSG00000030827</b> | <b><i>Fgf21</i></b>  | <b>-2.31</b>                 | <b>9.827E-19</b>  |
| ENSMUSG00000000126        | <i>Wnt9a</i>         | -2.28                        | 6.808E-108        |
| ENSMUSG00000079014        | <i>Serpina3i</i>     | -2.28                        | 5.402E-147        |
| ENSMUSG00000022661        | <i>Cd200</i>         | -2.25                        | 8.623E-263        |
| ENSMUSG00000031841        | <i>Cdh13</i>         | -2.24                        | 3.468E-217        |
| <b>ENSMUSG00000046318</b> | <b><i>Ccbe1</i></b>  | <b>-2.22</b>                 | <b>3.541E-43</b>  |
| ENSMUSG00000024486        | <i>Hbegf</i>         | -2.21                        | 8.345E-280        |
| ENSMUSG00000020023        | <i>Tmcc3</i>         | -2.18                        | 6.203E-164        |
| ENSMUSG00000022240        | <i>Ctnnd2</i>        | -2.18                        | 7.366E-149        |
| ENSMUSG00000076441        | <i>Ass1</i>          | -2.17                        | 6.351E-39         |
| ENSMUSG00000037419        | <i>Endod1</i>        | -2.16                        | 4.816E-302        |
| ENSMUSG00000029223        | <i>Uchl1</i>         | -2.15                        | 1.037E-267        |
| ENSMUSG00000067001        | <i>Serpinb7</i>      | -2.15                        | 2.334E-48         |
| ENSMUSG00000063727        | <i>Tnfrsf11b</i>     | -2.14                        | 3.515E-65         |
| ENSMUSG00000054136        | <i>Adm2</i>          | -2.13                        | 6.251E-64         |
| <b>ENSMUSG00000031075</b> | <b><i>Ano1</i></b>   | <b>-2.11</b>                 | <b>4.962E-166</b> |
| ENSMUSG00000044258        | <i>Ctla2a</i>        | -2.11                        | 0.000E+00         |
| ENSMUSG00000032715        | <i>Trib3</i>         | -2.11                        | 4.199E-253        |
| ENSMUSG00000000782        | <i>Tcf7</i>          | -2.10                        | 9.162E-18         |
| ENSMUSG00000037428        | <i>Vgf</i>           | -2.10                        | 3.227E-24         |
| <b>ENSMUSG00000009687</b> | <b><i>Fxyd5</i></b>  | <b>-2.08</b>                 | <b>3.069E-277</b> |

| Gene_id                   | Gene_name            | Log <sub>2</sub> fold change | P-value           |
|---------------------------|----------------------|------------------------------|-------------------|
| ENSMUSG00000006221        | <i>Hspb7</i>         | -2.08                        | 1.577E-84         |
| ENSMUSG00000053062        | <i>Jam2</i>          | -2.06                        | 2.009E-175        |
| ENSMUSG00000020689        | <i>Itgb3</i>         | -2.04                        | 1.447E-320        |
| ENSMUSG00000039813        | <i>Tbc1d2</i>        | -2.04                        | 1.011E-179        |
| ENSMUSG00000020788        | <i>Atp2a3</i>        | -2.00                        | 1.590E-38         |
| ENSMUSG00000075012        | <i>Fjx1</i>          | -1.98                        | 7.453E-49         |
| ENSMUSG00000032415        | <i>Ube2cbp</i>       | -1.98                        | 1.278E-37         |
| ENSMUSG00000038264        | <i>Sema7a</i>        | -1.97                        | 1.491E-22         |
| ENSMUSG00000020846        | <i>Fam101b</i>       | -1.96                        | 0.000E+00         |
| ENSMUSG00000036687        | <i>Tmem184a</i>      | -1.96                        | 8.522E-35         |
| ENSMUSG00000028542        | <i>Slc6a9</i>        | -1.95                        | 0.000E+00         |
| ENSMUSG00000044254        | <i>Pcsk9</i>         | -1.91                        | 1.939E-51         |
| ENSMUSG00000022952        | <i>Runx1</i>         | -1.91                        | 1.501E-192        |
| ENSMUSG00000025068        | <i>Gsto1</i>         | -1.91                        | 0.000E+00         |
| ENSMUSG00000074676        | <i>Foxs1</i>         | -1.90                        | 1.635E-64         |
| ENSMUSG00000005124        | <i>Wisp1</i>         | -1.90                        | 1.157E-204        |
| ENSMUSG00000027456        | <i>Sdcbp2</i>        | -1.88                        | 1.566E-08         |
| ENSMUSG00000020614        | <i>Fam20a</i>        | -1.88                        | 1.297E-152        |
| ENSMUSG00000029161        | <i>Cgrefl</i>        | -1.87                        | 1.219E-13         |
| ENSMUSG00000072494        | <i>Ppp1r3e</i>       | -1.86                        | 8.370E-14         |
| ENSMUSG00000016918        | <i>Sulf1</i>         | -1.85                        | 8.448E-312        |
| ENSMUSG00000026494        | <i>Kif26b</i>        | -1.83                        | 7.015E-89         |
| ENSMUSG00000036181        | <i>Hist1h1c</i>      | -1.81                        | 1.322E-49         |
| ENSMUSG00000051669        | <i>AU021092</i>      | -1.80                        | 1.838E-105        |
| ENSMUSG00000027313        | <i>Chac1</i>         | -1.79                        | 1.836E-149        |
| ENSMUSG00000053846        | <i>Lipg</i>          | -1.78                        | 1.740E-121        |
| ENSMUSG00000051048        | <i>P4ha3</i>         | -1.76                        | 8.983E-159        |
| <b>ENSMUSG00000027750</b> | <b><i>Postn</i></b>  | <b>-1.76</b>                 | <b>1.130E-227</b> |
| ENSMUSG00000032281        | <i>Acsbg1</i>        | -1.76                        | 7.088E-64         |
| ENSMUSG00000027397        | <i>Slc20a1</i>       | -1.75                        | 0.000E+00         |
| ENSMUSG00000022367        | <i>Has2</i>          | -1.74                        | 3.372E-297        |
| ENSMUSG00000036040        | <i>Adamtsl2</i>      | -1.74                        | 1.279E-21         |
| ENSMUSG00000026475        | <i>Rgs16</i>         | -1.73                        | 3.475E-12         |
| ENSMUSG00000032060        | <i>Cryab</i>         | -1.73                        | 0.000E+00         |
| ENSMUSG00000038244        | <i>Mical2</i>        | -1.72                        | 0.000E+00         |
| ENSMUSG00000024544        | <i>Ldlrad4</i>       | -1.72                        | 2.176E-151        |
| <b>ENSMUSG00000026069</b> | <b><i>Il1rl1</i></b> | <b>-1.72</b>                 | <b>1.841E-86</b>  |
| ENSMUSG00000037370        | <i>Enpp1</i>         | -1.72                        | 7.727E-46         |
| ENSMUSG00000002847        | <i>Pla1a</i>         | -1.71                        | 1.086E-13         |
| ENSMUSG00000025140        | <i>Pycr1</i>         | -1.70                        | 9.875E-190        |

| Gene_id             | Gene_name      | Log <sub>2</sub> fold change | P-value    |
|---------------------|----------------|------------------------------|------------|
| ENSMUSG00000001918  | <i>Slc1a5</i>  | -1.70                        | 8.816E-209 |
| ENSMUSG000000036390 | <i>Gadd45a</i> | -1.67                        | 9.520E-196 |
| ENSMUSG000000030562 | <i>Nox4</i>    | -1.67                        | 5.418E-66  |
| ENSMUSG000000027656 | <i>Wisp2</i>   | -1.67                        | 3.447E-235 |
| ENSMUSG000000017724 | <i>Etv4</i>    | -1.67                        | 2.920E-67  |
| ENSMUSG000000026548 | <i>Slamf9</i>  | -1.66                        | 9.054E-12  |
| ENSMUSG000000029446 | <i>Psph</i>    | -1.66                        | 6.715E-174 |
| ENSMUSG000000022817 | <i>Itgb5</i>   | -1.65                        | 0.000E+00  |
| ENSMUSG000000014846 | <i>Tppp3</i>   | -1.65                        | 2.236E-219 |
| ENSMUSG000000032911 | <i>Cspg4</i>   | -1.64                        | 1.281E-300 |
| ENSMUSG000000068196 | <i>Col8a1</i>  | -1.64                        | 3.165E-304 |
| ENSMUSG000000006301 | <i>Tmbim1</i>  | -1.63                        | 4.422E-299 |
| ENSMUSG000000042622 | <i>Maff</i>    | -1.62                        | 3.707E-177 |
| ENSMUSG000000038508 | <i>Gdf15</i>   | -1.61                        | 2.152E-08  |
| ENSMUSG000000050222 | <i>Il17d</i>   | -1.60                        | 1.157E-78  |
| ENSMUSG000000074874 | <i>Ctla2b</i>  | -1.60                        | 4.204E-46  |
| ENSMUSG000000041120 | <i>Nbl1</i>    | -1.60                        | 6.149E-236 |
| ENSMUSG000000024529 | <i>Lox</i>     | -1.59                        | 2.996E-242 |
| ENSMUSG000000021260 | <i>Hhip1l</i>  | -1.59                        | 2.947E-56  |

## Complete unedited gel for the cropped gel shown in Figure 3A

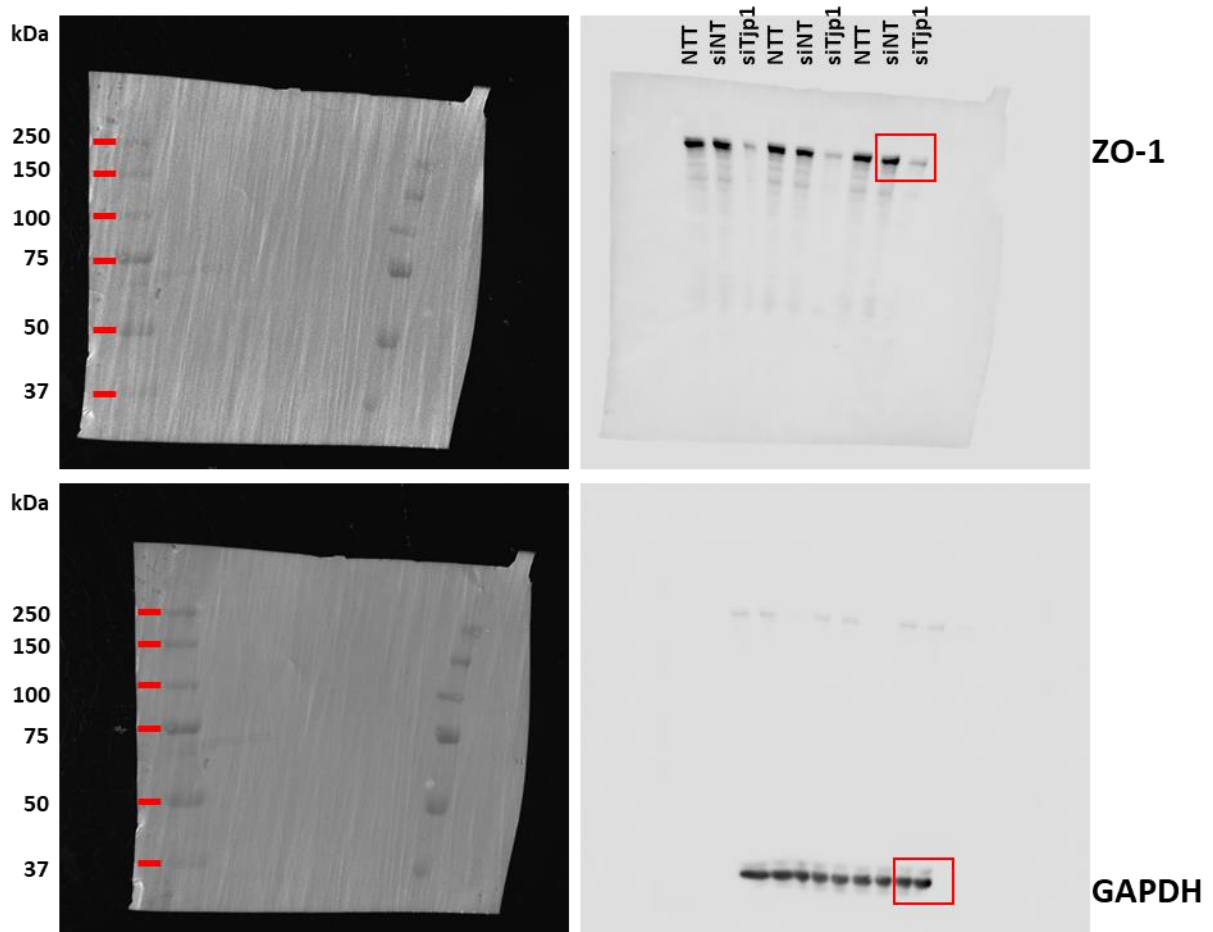

Representative cropped images shown in Figure 3A are highlighted in red. NTT (non-treated control), siNT (non-targeting control), siTjP1 (siRNA targeting TJP1/ZO-1).
